# Supplementary material for: Screen Time, Physical Activity and Self-Esteem in Children: The Ulm Birth Cohort Study
Source: PubMed Central journal article supplement (PMC6025387; doi:10.3390/ijerph15061275), 2018-06-16
Supplement: ijerph-15-01275-s001.pdf [file ijerph-15-01275-s001.pdf]

## Supplementary Materials

**Table S1. Characteristics of study-population, parent-reported variables**

| Variable                                                                                  | Study population<br>(n = 520) <sup>1</sup> |
|-------------------------------------------------------------------------------------------|--------------------------------------------|
|                                                                                           | Mean, SD                                   |
| <b>Self-esteem</b> child age 11, mean (SD), parent-reported                               | 71.1 (12.4)                                |
| <b>Self-esteem</b> child age 13, mean (SD), parent-reported                               | 69.5 (14.0)                                |
| Difference of <b>self-esteem</b> child age 13 and 11, mean (SD), parent-reported          |                                            |
| Male                                                                                      | -1.4 (14.5)                                |
| Female                                                                                    | -2.2 (15.0)                                |
| <b>Watching TV</b> child age 11 (h/d), mean (SD), parent-reported                         | 1.1 (0.7)                                  |
| <b>Watching TV</b> child age 13 (h/d), mean (SD), parent-reported                         | 1.4 (0.7)                                  |
| <b>Other screen time</b> child age 11 (h/d), mean (SD), parent-reported                   | 0.6 (0.5)                                  |
| <b>Other screen time</b> child age 13 (h/d), mean (SD), parent-reported                   | 2.8 (1.1)                                  |
| <b>Satisfaction with family relationship</b> child age 11, mean (SD), parent-reported     | 79.8 (12.4)                                |
| <b>Satisfaction with family relationship</b> child age 13, mean (SD), parent-reported     | 78.5 (13.2)                                |
| <b>Satisfaction with friendship relationship</b> child age 11, mean (SD), parent-reported | 77.2 (13.2)                                |
| <b>Satisfaction with friendship relationship</b> child age 13, mean (SD), parent-reported | 76.7 (14.1)                                |

<sup>1</sup> total n may differ because of missing values for some variables

**Table S2.** Determinants of parent-reported self-esteem in boys (n = 246), all variables are parent-reported.<sup>1</sup>

|                                                                         | Self-esteem <sub>11</sub> |      |                | Self-esteem <sub>13</sub> |       |                | Self-esteem <sub>13-11</sub> |      |                |
|-------------------------------------------------------------------------|---------------------------|------|----------------|---------------------------|-------|----------------|------------------------------|------|----------------|
|                                                                         | b                         | p    | R <sup>2</sup> | b                         | p     | R <sup>2</sup> | b                            | p    | R <sup>2</sup> |
| <b>Model 1: crude</b>                                                   |                           |      |                |                           |       |                |                              |      |                |
| Watching TV <sub>11</sub> (h/d)                                         | -0.32                     | 0.79 | 0.00           | 1.31                      | 0.29  | 0.00           | 1.62                         | 0.21 | 0.01           |
| <b>Model 2: crude</b>                                                   |                           |      |                |                           |       |                |                              |      |                |
| Other screen time <sub>11</sub> (h/d)                                   | -1.61                     | 0.31 | 0.00           | -0.60                     | 0.72  | 0.00           | 1.01                         | 0.57 | 0.00           |
| <b>Model 3: mutually adjusted</b>                                       |                           |      |                |                           |       |                |                              |      |                |
| Watching TV <sub>11</sub> (h/d)                                         | 0.29                      | 0.82 | 0.00           | 2.24                      | 0.09  | 0.00           | 1.95                         | 0.17 | 0.00           |
| Other screen time <sub>11</sub> (h/d)                                   | -1.75                     | 0.31 |                | -1.70                     | 0.34  |                | 0.05                         | 0.99 |                |
| <b>Model 4<sup>2</sup></b>                                              |                           |      |                |                           |       |                |                              |      |                |
| Watching TV <sub>11</sub> (h/d)                                         | -0.04                     | 0.97 | 0.19           | 1.89                      | 0.16  | 0.05           | 1.93                         | 0.17 | 0.06           |
| Other screen time <sub>11</sub> (h/d)                                   | -1.83                     | 0.25 |                | -1.95                     | 0.28  |                | -0.11                        | 0.95 |                |
| <b>Model 5<sup>3</sup></b>                                              |                           |      |                |                           |       |                |                              |      |                |
| Watching TV <sub>11</sub> (h/d)                                         |                           |      |                | 1.72                      | 0.27  |                | 1.88                         | 0.26 |                |
| Other screen time <sub>11</sub> (h/d)                                   |                           |      |                | -2.76                     | 0.19  |                | -0.23                        | 0.92 |                |
| TV <sub>13</sub> -TV <sub>11</sub> (h/d)                                |                           |      |                | -2.29                     | 0.74  | 0.05           | -2.72                        | 0.10 | 0.11           |
| Other screen time <sub>13</sub> - other screen time <sub>11</sub> (h/d) |                           |      |                | -0.34                     | 0.15  |                | 0.30                         | 0.78 |                |
| <b>Model 6<sup>4</sup></b>                                              |                           |      |                |                           |       |                |                              |      |                |
| Watching TV <sub>11</sub> (h/d)                                         |                           |      |                | 1.76                      | 0.174 |                |                              |      |                |
| Other screen time <sub>11</sub> (h/d)                                   |                           |      |                | -1.63                     | 0.36  |                |                              |      |                |
| TV <sub>13</sub> -TV <sub>11</sub> (h/d)                                |                           |      |                | -2.48                     | 0.093 | 0.20           |                              |      |                |
| Other screen time <sub>13</sub> - other screen time <sub>11</sub> (h/d) |                           |      |                | -0.05                     | 0.95  |                |                              |      |                |

Abbreviations: b: beta estimates; h/d: hours/day

<sup>1</sup> unstandardized coefficients are presented. The subscript numbers indicate the age of the children (11 or 13 years)

<sup>2</sup> further adjusted for school type, and satisfaction with family relationship<sub>11</sub> or relationship<sub>13</sub> depending on the outcome

<sup>3</sup> further adjusted for school type, satisfaction with family relationship<sub>13</sub>, time spent on watching TV<sub>13</sub> + other screen time<sub>13</sub>

<sup>4</sup> further adjusted for school type, satisfaction with family relationship<sub>13</sub>, time spent on watching TV<sub>13</sub> + other screen time<sub>13</sub>, and self-esteem<sub>11</sub>

**Table S3.** Determinants of parent-reported self-esteem in girls (n = 274), all variables are parent-reported.<sup>1</sup>

|                                                                         | Self-esteem <sub>11</sub> |                  |                | Self-esteem <sub>13</sub> |              |                | Self-esteem <sub>13-11</sub> |      |                |
|-------------------------------------------------------------------------|---------------------------|------------------|----------------|---------------------------|--------------|----------------|------------------------------|------|----------------|
|                                                                         | b                         | p                | R <sup>2</sup> | b                         | p            | R <sup>2</sup> | b                            | p    | R <sup>2</sup> |
| <b>Model 1: crude</b>                                                   |                           |                  |                |                           |              |                |                              |      |                |
| Watching TV <sub>11</sub> (h/d)                                         | -4.06                     | <b>&lt;0.001</b> | 0.05           | -3.95                     | <b>0.004</b> | 0.03           | 0.00                         | 1.00 | 0.00           |
| <b>Model 2: crude</b>                                                   |                           |                  |                |                           |              |                |                              |      |                |
| Other screen time <sub>11</sub> (h/d)                                   | -3.64                     | <b>0.027</b>     | 0.02           | -4.38                     | <b>0.034</b> | 0.02           | -0.82                        | 0.70 | 0.00           |
| <b>Model 3: mutually adjusted</b>                                       |                           |                  |                |                           |              |                |                              |      |                |
| Watching TV <sub>11</sub> (h/d)                                         | -3.61                     | <b>0.002</b>     | 0.05           | -3.45                     | <b>0.015</b> | 0.04           | 0.07                         | 0.96 | 0.00           |
| Other screen time <sub>11</sub> (h/d)                                   | -2.03                     | 0.25             |                | -2.68                     | 0.21         |                | -0.72                        | 0.75 |                |
| <b>Model 4<sup>2</sup></b>                                              |                           |                  |                |                           |              |                |                              |      |                |
| Watching TV <sub>11</sub> (h/d)                                         | -2.65                     | <b>0.022</b>     | 0.19           | -3.71                     | <b>0.014</b> | 0.05           | -1.05                        | 0.50 | 0.03           |
| Other screen time <sub>11</sub> (h/d)                                   | -2.49                     | 0.14             |                | -2.19                     | 0.32         |                | 0.21                         | 0.93 |                |
| <b>Model 5<sup>3</sup></b>                                              |                           |                  |                |                           |              |                |                              |      |                |
| Watching TV <sub>11</sub> (h/d)                                         |                           |                  |                | -2.95                     | 0.095        |                | -0.25                        | 0.89 |                |
| Other screen time <sub>11</sub> (h/d)                                   |                           |                  |                | -3.41                     | 0.14         |                | -0.51                        | 0.83 |                |
| TV <sub>13</sub> – TV <sub>11</sub> (h/d)                               |                           |                  |                | 0.13                      | 0.21         | 0.07           | -0.13                        | 0.94 | 0.04           |
| Other screen time <sub>13</sub> - other screen time <sub>11</sub> (h/d) |                           |                  |                | -1.16                     | 0.94         |                | -0.44                        | 0.63 |                |
| <b>Model 6<sup>4</sup></b>                                              |                           |                  |                |                           |              |                |                              |      |                |
| Watching TV <sub>11</sub> (h/d)                                         |                           |                  |                | -1.62                     | 0.32         |                |                              |      |                |
| Other screen time <sub>11</sub> (h/d)                                   |                           |                  |                | -1.99                     | 0.36         |                |                              |      |                |
| TV <sub>13</sub> – TV <sub>11</sub> (h/d)                               |                           |                  |                | 0.00                      | 1.00         | 0.18           |                              |      |                |
| Other screen time <sub>13</sub> - other screen time <sub>11</sub> (h/d) |                           |                  |                | -0.80                     | 0.35         |                |                              |      |                |

Abbreviations: b: beta estimates; bold letters indicate statistical significance at  $p < 0.05$ ; h/d: hours/day

<sup>1</sup> unstandardized coefficients are presented. The subscript numbers indicate the age of the children (11 or 13 years)

<sup>2</sup> further adjusted for school type, and satisfaction with family relationship<sub>11</sub> or relationship<sub>13</sub> depending on the outcome

<sup>3</sup> further adjusted for school type, satisfaction with family relationship<sub>13</sub>, time spent on watching TV<sub>13</sub> + other screen time<sub>13</sub>

<sup>4</sup> further adjusted for school type, satisfaction with family relationship<sub>13</sub>, time spent on watching TV<sub>13</sub> + other screen time<sub>13</sub>, and self-esteem<sub>11</sub>
